# Supplementary material for: Syntheses and crystal structures of CuIIBiIII, CuIIBaIICuII, [CuIIPbII]2 and cocrystallized (UVIO2)2.4CuIIcomplexes: structural diversity of the coordination compounds derived from N,N′-ethylenebis(3-ethoxysalicylaldiimine)
Source: Royal Society of Chemistry journal article supplement (doi:10.1039/b913408e), 2009-09-22
Supplement: b913408e.pdf [file b913408e.pdf]

**Electronic Supplementary Information**

**For**

**Syntheses and Structures of  $\text{Cu}^{\text{II}}\text{Bi}^{\text{III}}$ ,  $\text{Cu}^{\text{II}}\text{Ba}^{\text{II}}\text{Cu}^{\text{II}}$ ,  $[\text{Cu}^{\text{II}}\text{Pb}^{\text{II}}]_2$  and  
Cocrystallized  $(\text{U}^{\text{VI}}\text{O}_2)_2 \cdot 4\text{Cu}^{\text{II}}$  Complexes: Structural Diversity of the  
Coordination Compounds Derived from *N,N'*-Ethylenebis(3-  
Ethoxysalicylaldimine)**

**Susanta Hazra, Sujit Sasmal, Malabika Nayak, Hazel A. Sparkes, Judith A. K.  
Howard and Sasankasekhar Mohanta\***

**Table S1**

Bond angles (°) in the coordination environments of the bismuth(III) in **1** and barium(II) in **2**.

---

| <b>Compound 1</b> |           | <b>Compound 2</b> |            |
|-------------------|-----------|-------------------|------------|
| O(1)–Bi(1)–O(2)   | 62.93(6)  | O(1)–Ba(1)–O(2)   | 54.29(7)   |
| O(1)–Bi(1)–O(3)   | 122.99(6) | O(1)–Ba(1)–O(3)   | 107.58(7)  |
| O(1)–Bi(1)–O(4)   | 154.98(6) | O(1)–Ba(1)–O(4)   | 125.62(7)  |
| O(1)–Bi(1)–O(5)   | 70.11(6)  | O(1)–Ba(1)–O(5)   | 64.83(7)   |
| O(1)–Bi(1)–O(7)   | 114.15(6) | O(1)–Ba(1)–O(6)   | 110.74(7)  |
| O(1)–Bi(1)–O(8)   | 122.06(6) | O(1)–Ba(1)–O(7)   | 167.48(7)  |
| O(1)–Bi(1)–O(10)  | 78.84(6)  | O(1)–Ba(1)–O(8)   | 136.61(6)  |
| O(1)–Bi(1)–O(11)  | 76.24(6)  | O(1)–Ba(1)–O(9A)  | 94.5(6)    |
| O(1)–Bi(1)–O(13)  | 77.24(6)  | O(1)–Ba(1)–O(10A) | 68.61(14)  |
| O(2)–Bi(1)–O(3)   | 65.43(6)  | O(1)–Ba(1)–O(12A) | 73.83(11)  |
| O(2)–Bi(1)–O(4)   | 125.60(6) | O(2)–Ba(1)–O(3)   | 56.25(6)   |
| O(2)–Bi(1)–O(5)   | 74.29(6)  | O(2)–Ba(1)–O(4)   | 99.18(6)   |
| O(2)–Bi(1)–O(7)   | 73.71(6)  | O(2)–Ba(1)–O(5)   | 63.75(7)   |
| O(2)–Bi(1)–O(8)   | 138.91(6) | O(2)–Ba(1)–O(6)   | 73.32(7)   |
| O(2)–Bi(1)–O(10)  | 135.08(7) | O(2)–Ba(1)–O(7)   | 118.65(7)  |
| O(2)–Bi(1)–O(11)  | 123.06(6) | O(2)–Ba(1)–O(8)   | 163.17(6)  |
| O(2)–Bi(1)–O(13)  | 81.82(6)  | O(2)–Ba(1)–O(9A)  | 124.9(6)   |
| O(3)–Bi(1)–O(4)   | 60.23(6)  | O(2)–Ba(1)–O(10A) | 121.20(15) |
| O(3)–Bi(1)–O(5)   | 116.52(6) | O(2)–Ba(1)–O(12A) | 102.20(10) |
| O(3)–Bi(1)–O(7)   | 70.97(6)  | O(3)–Ba(1)–O(4)   | 51.75(6)   |
| O(3)–Bi(1)–O(8)   | 112.28(6) | O(3)–Ba(1)–O(5)   | 100.62(6)  |
| O(3)–Bi(1)–O(10)  | 158.00(6) | O(3)–Ba(1)–O(6)   | 64.27(7)   |
| O(3)–Bi(1)–O(11)  | 115.59(6) | O(3)–Ba(1)–O(7)   | 70.29(6)   |
| O(3)–Bi(1)–O(13)  | 73.17(6)  | O(3)–Ba(1)–O(8)   | 108.02(6)  |
| O(4)–Bi(1)–O(5)   | 133.21(6) | O(3)–Ba(1)–O(9A)  | 142.7(2)   |
| O(4)–Bi(1)–O(7)   | 90.64(6)  | O(3)–Ba(1)–O(10A) | 174.5(2)   |
| O(4)–Bi(1)–O(8)   | 69.17(5)  | O(3)–Ba(1)–O(12A) | 103.73(9)  |
| O(4)–Bi(1)–O(10)  | 99.05(6)  | O(4)–Ba(1)–O(5)   | 151.31(6)  |
| O(4)–Bi(1)–O(11)  | 80.53(6)  | O(4)–Ba(1)–O(6)   | 102.37(6)  |
| O(4)–Bi(1)–O(13)  | 80.87(6)  | O(4)–Ba(1)–O(7)   | 63.39(6)   |
| O(5)–Bi(1)–O(7)   | 51.34(6)  | O(4)–Ba(1)–O(8)   | 64.17(6)   |
| O(5)–Bi(1)–O(8)   | 71.09(6)  | O(4)–Ba(1)–O(9A)  | 133.7(7)   |
| O(5)–Bi(1)–O(10)  | 71.02(6)  | O(4)–Ba(1)–O(10A) | 126.8(3)   |
| O(5)–Bi(1)–O(11)  | 127.37(6) | O(4)–Ba(1)–O(12A) | 66.77(10)  |
| O(5)–Bi(1)–O(13)  | 145.69(6) | O(5)–Ba(1)–O(6)   | 52.06(7)   |
| O(7)–Bi(1)–O(8)   | 67.62(6)  | O(5)–Ba(1)–O(7)   | 103.08(7)  |
| O(7)–Bi(1)–O(10)  | 104.26(6) | O(5)–Ba(1)–O(8)   | 129.99(6)  |
| O(7)–Bi(1)–O(11)  | 163.16(7) | O(5)–Ba(1)–O(9A)  | 61.8(6)    |
| O(7)–Bi(1)–O(13)  | 142.51(6) | O(5)–Ba(1)–O(10A) | 81.5(3)    |
| O(8)–Bi(1)–O(10)  | 48.49(6)  | O(5)–Ba(1)–O(12A) | 136.66(10) |

Supplementary Material for CrystEngComm  
This journal is (c) The Royal Society of Chemistry 2009

|                   |           |                     |            |
|-------------------|-----------|---------------------|------------|
| O(8)–Bi(1)–O(11)  | 95.73(6)  | O(6)–Ba(1)–O(7)     | 56.94(7)   |
| O(8)–Bi(1)–O(13)  | 138.64(6) | O(6)–Ba(1)–O(8)     | 106.60(7)  |
| O(10)–Bi(1)–O(11) | 63.53(6)  | O(6)–Ba(1)–O(9A)    | 80.05(18)  |
| O(10)–Bi(1)–O(13) | 113.11(6) | O(6)–Ba(1)–O(10A)   | 120.5(3)   |
| O(11)–Bi(1)–O(13) | 50.38(6)  | O(6)–Ba(1)–O(12A)   | 167.83(9)  |
|                   |           | O(7)–Ba(1)–O(8)     | 53.22(6)   |
|                   |           | O(7)–Ba(1)–O(9A)    | 81.6(6)    |
|                   |           | O(7)–Ba(1)–O(10A)   | 114.34(15) |
|                   |           | O(7)–Ba(1)–O(12A)   | 118.68(11) |
|                   |           | O(8)–Ba(1)–O(9A)    | 70.8(7)    |
|                   |           | O(8)–Ba(1)–O(10A)   | 73.88(17)  |
|                   |           | O(8)–Ba(1)–O(12A)   | 74.30(10)  |
|                   |           | O(9A)–Ba(1)–O(10A)  | 42.7(3)    |
|                   |           | O(9A)–Ba(1)–O(12A)  | 111.3(2)   |
|                   |           | O(10A)–Ba(1)–O(12A) | 71.6(3)    |

---

**Table S2**

Bond angles (°) in the coordination environments of the lead(II) in **3** and uranium(VI) in **4**.

---

| <b>Compound 3</b> |            | <b>Compound 4</b> |           |
|-------------------|------------|-------------------|-----------|
| O(1A)–Pb(1)–O(2)  | 61.0(2)    | O(17)–U(1)–O(18)  | 175.72(9) |
| O(1A)–Pb(1)–O(3)  | 125.6(2)   | O(11)–U(1)–O(15)  | 161.15(6) |
| O(1A)–Pb(1)–O(4)  | 172.06(15) | O(12)–U(1)–O(19G) | 178.75(6) |
| O(1A)–Pb(1)–O(5)  | 114.52(12) | O(14)–U(1)–O(19)  | 176.22(6) |
| O(1A)–Pb(1)–O(6)  | 72.07(14)  | O(17)–U(1)–O(11)  | 89.87(8)  |
| O(1A)–Pb(1)–O(7C) | 74.5(2)    | O(17)–U(1)–O(12)  | 89.54(8)  |
| O(1A)–Pb(1)–O(8)  | 76.46(17)  | O(17)–U(1)–O(14)  | 88.05(8)  |
| O(1A)–Pb(1)–O(9)  | 100.21(12) | O(17)–U(1)–O(15)  | 89.63(8)  |
| O(2)–Pb(1)–O(3)   | 65.14(9)   | O(17)–U(1)–O(19)  | 93.59(8)  |
| O(2)–Pb(1)–O(4)   | 125.30(8)  | O(17)–U(1)–O(19G) | 90.26(8)  |
| O(2)–Pb(1)–O(5)   | 86.74(10)  | O(18)–U(1)–O(11)  | 90.30(8)  |
| O(2)–Pb(1)–O(6)   | 82.18(10)  | O(18)–U(1)–O(12)  | 87.30(9)  |
| O(2)–Pb(1)–O(7C)  | 133.76(9)  | O(18)–U(1)–O(14)  | 87.90(8)  |
| O(2)–Pb(1)–O(8)   | 69.29(10)  | O(18)–U(1)–O(15)  | 88.83(8)  |
| O(2)–Pb(1)–O(9)   | 114.93(10) | O(18)–U(1)–O(19)  | 90.37(8)  |
| O(3)–Pb(1)–O(4)   | 60.21(8)   | O(18)–U(1)–O(19G) | 92.84(8)  |
| O(3)–Pb(1)–O(5)   | 68.27(9)   | O(11)–U(1)–O(12)  | 49.85(6)  |
| O(3)–Pb(1)–O(6)   | 108.11(9)  | O(11)–U(1)–O(14)  | 111.05(6) |
| O(3)–Pb(1)–O(7C)  | 159.53(9)  | O(11)–U(1)–O(19)  | 65.59(6)  |
| O(3)–Pb(1)–O(8)   | 78.38(10)  | O(11)–U(1)–O(19G) | 131.38(6) |
| O(3)–Pb(1)–O(9)   | 95.22(9)   | O(12)–U(1)–O(14)  | 61.22(6)  |
| O(4)–Pb(1)–O(5)   | 72.03(9)   | O(12)–U(1)–O(15)  | 111.30(6) |
| O(4)–Pb(1)–O(6)   | 112.34(9)  | O(12)–U(1)–O(19)  | 115.35(6) |
| O(4)–Pb(1)–O(7C)  | 100.19(9)  | O(14)–U(1)–O(15)  | 50.10(6)  |
| O(4)–Pb(1)–O(8)   | 100.80(10) | O(14)–U(1)–O(19G) | 117.54(6) |
| O(4)–Pb(1)–O(9)   | 73.04(9)   | O(15)–U(1)–O(19)  | 133.24(6) |
| O(5)–Pb(1)–O(6)   | 46.64(9)   | O(15)–U(1)–O(19G) | 67.46(6)  |
| O(5)–Pb(1)–O(7C)  | 101.51(9)  | O(19)–U(1)–O(19G) | 65.89(7)  |
| O(5)–Pb(1)–O(8)   | 144.98(10) |                   |           |
| O(5)–Pb(1)–O(9)   | 145.05(9)  |                   |           |
| O(6)–Pb(1)–O(7C)  | 72.30(9)   |                   |           |
| O(6)–Pb(1)–O(8)   | 145.01(11) |                   |           |
| O(6)–Pb(1)–O(9)   | 155.65(10) |                   |           |
| O(7C)–Pb(1)–O(8)  | 113.51(10) |                   |           |
| O(7C)–Pb(1)–O(9)  | 83.40(9)   |                   |           |
| O(8)–Pb(1)–O(9)   | 45.70(10)  |                   |           |

---

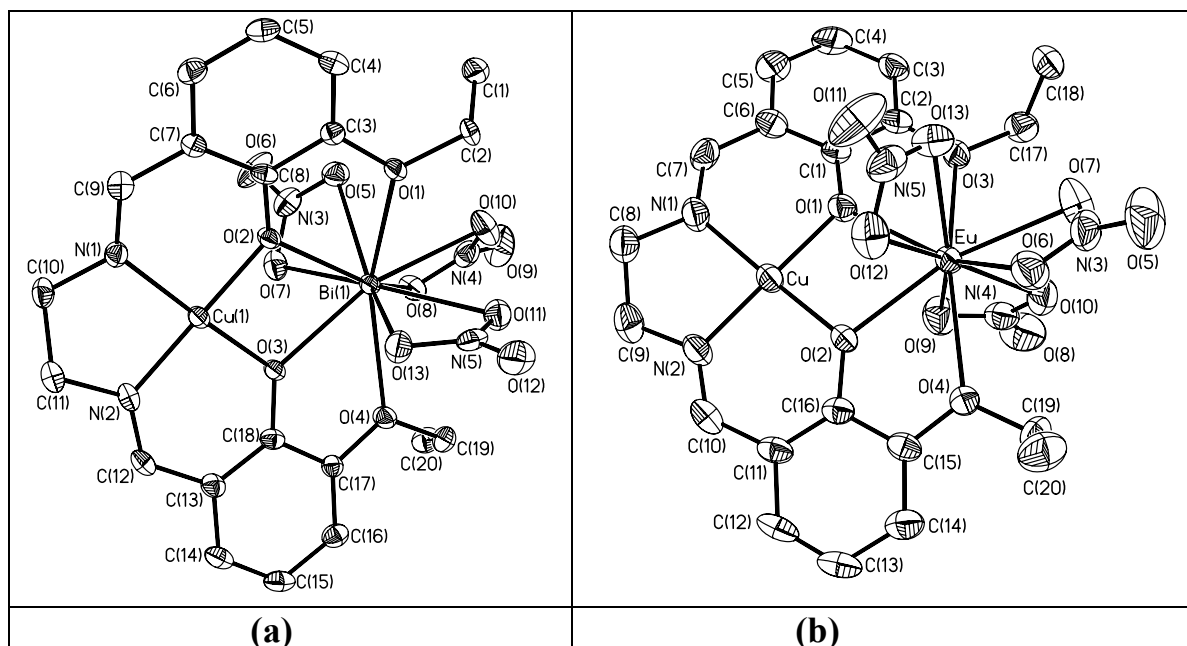

**Fig. S1** Crystal structures of (a)  $[\text{Cu}^{\text{II}}\text{L}^1\text{Bi}^{\text{III}}(\text{NO}_3)_3]$  and (b) a  $\text{Cu}^{\text{II}}\text{Ln}^{\text{III}}$  compound,  $[\text{Cu}^{\text{II}}\text{L}^1\text{Eu}^{\text{III}}(\text{NO}_3)_3]$ .

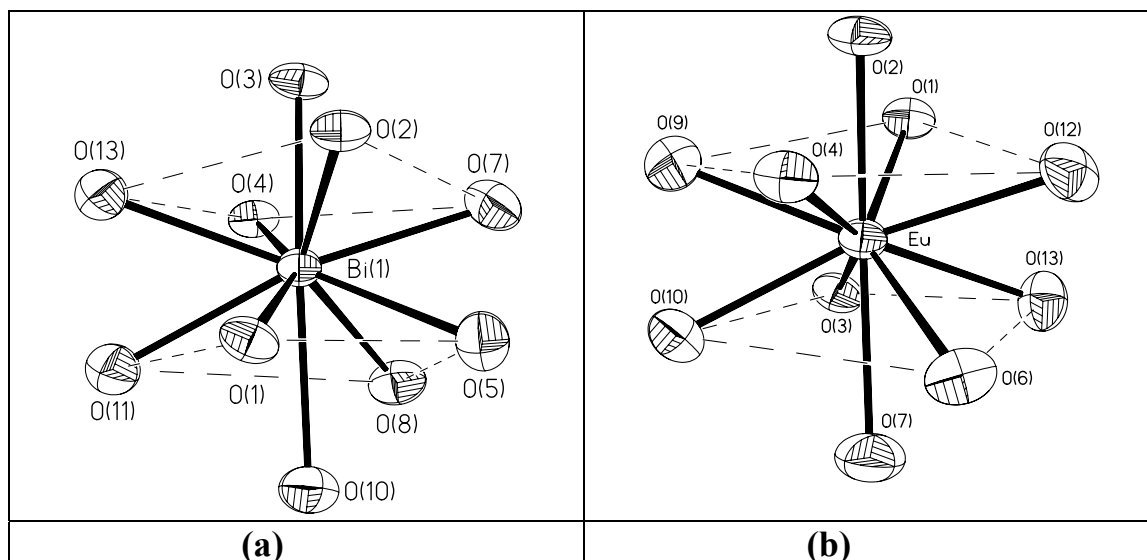

**Fig. S2** Distorted bi-capped square-antiprismatic coordination environment of (a) bismuth(III) in  $[\text{Cu}^{\text{II}}\text{L}^1\text{Bi}^{\text{III}}(\text{NO}_3)_3]$  and (b) europium(III) in  $[\text{Cu}^{\text{II}}\text{L}^1\text{Eu}^{\text{III}}(\text{NO}_3)_3]$ .

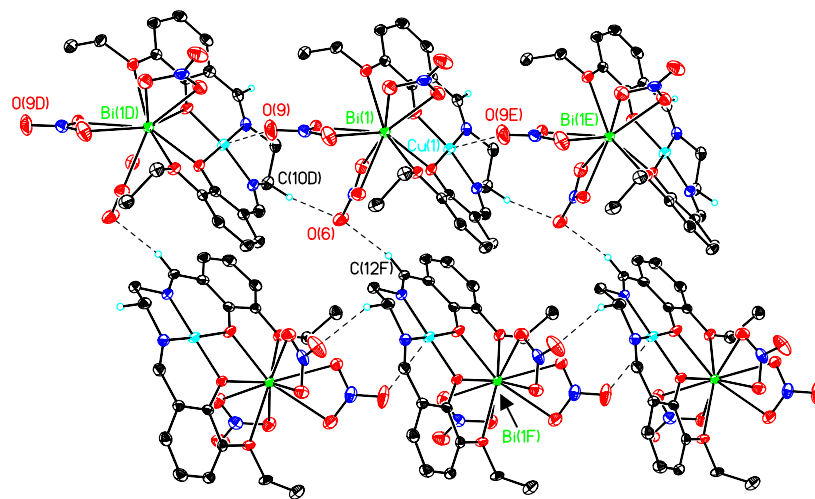

(a)

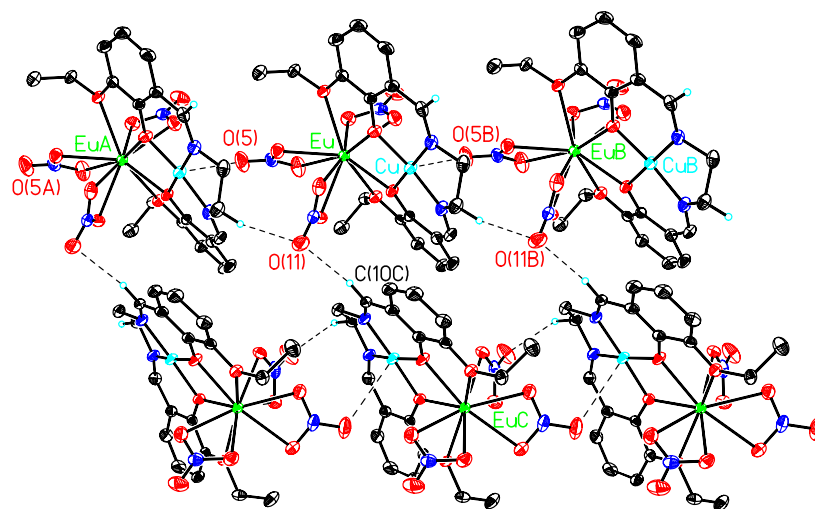

(b)

**Fig. S3** Perspective view to illustrate the two-dimensional structure of (a)  $[\text{Cu}^{\text{II}}\text{L}^{\text{I}}\text{Bi}^{\text{III}}(\text{NO}_3)_3]$  and (b)  $[\text{Cu}^{\text{II}}\text{L}^{\text{I}}\text{Eu}^{\text{III}}(\text{NO}_3)_3]$ . Except two hydrogens participating in hydrogen bonds, the hydrogens are omitted for clarity. Symmetry: D,  $1+x, y, z$ ; E,  $x-1, y, z$ ; F,  $3-x, -0.5y, 1.5-z$ . for (a) and A,  $1+x, y, z$ ; B,  $x-1, y, z$ ; C,  $1-x, 0.5+y, 0.5-z$ . for (b).
